# Supplementary material for: Dendrite-free and air-stable lithium metal batteries enabled by electroless plating with aluminum fluoride
Source: Royal Society of Chemistry journal article supplement (doi:10.1039/d0ta02410d), 2020-01-01
Supplement: d0ta02410d1.pdf [file d0ta02410d1.pdf]

## Supporting Information

### **Dendrite-free and air-stable lithium metal batteries enabled by electroless plating with aluminum fluoride**

Zaisheng Wang,<sup>a†</sup> Zhenming Xu,<sup>d†</sup> Xiaojing Jin,<sup>a</sup> Jianhui Li,<sup>c</sup> Qingshuai Xu,<sup>a</sup> Yanan

Chong,<sup>a</sup> Weishan Li,<sup>c</sup> Daiqi Ye,<sup>a</sup> Yingying Lu,<sup>e</sup> Yongcai Qiu<sup>a,b\*</sup>

<sup>a</sup> School of Environment and Energy, South China University of Technology,  
Guangzhou 510006, China

<sup>b</sup> State Key Laboratory of Luminescent Materials and Devices, South China  
University of Technology, Guangzhou, China

<sup>c</sup> School of Chemistry and Environment, South China normal University, Guangzhou  
510006, China

<sup>d</sup> Harvard John. A. Paulson School of Engineering and Applied Sciences, Harvard  
University, 29 Oxford St, Cambridge, Massachusetts, 02138, USA

† These authors contributed equally to this work.

\*Corresponding Author E-mail: (ycqiu@scut.edu.cn;)

---

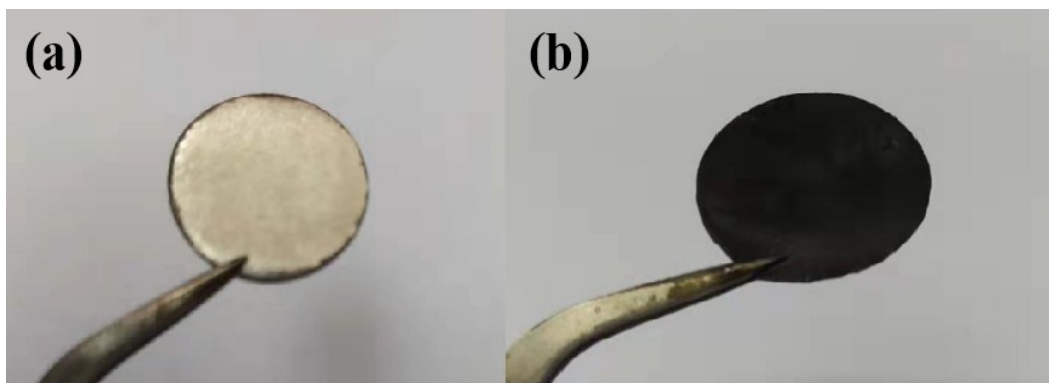

**Figure S1.** Digital photos of (a) Li foil and (b) Li surface after reacting with a supersaturated solution of  $\text{AlF}_3$  in carbonate ester electrolyte.

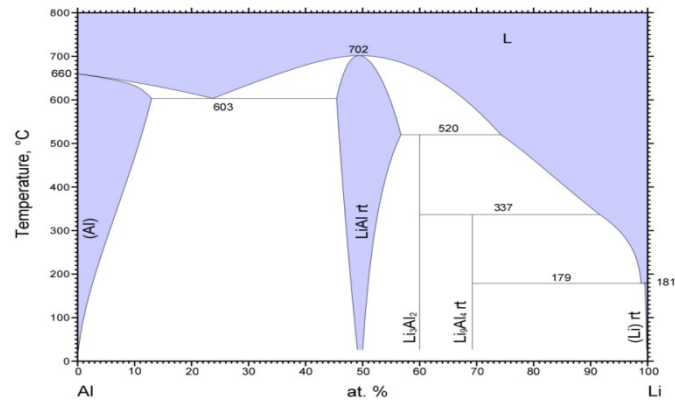

**Figure S2.** Phase diagram of Li with Al. L refers to liquid, whereas Li means lithium metal phase at room temperature.

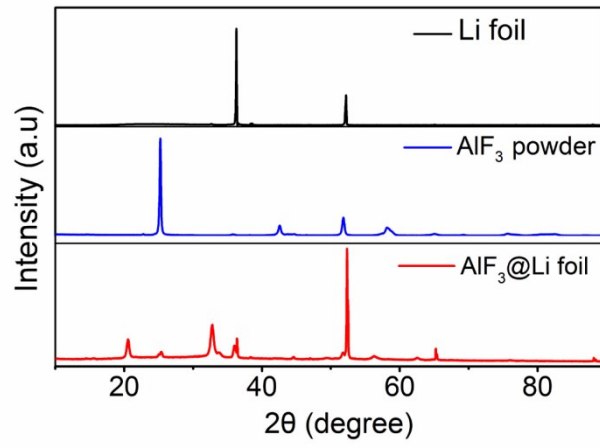

**Figure S3.** XRD characterizations of Li foil, AlF<sub>3</sub> powder and AlF<sub>3</sub>@Li foil.

| Surface | eV/Å <sup>2</sup> |
|---------|-------------------|
| 001     | 0.155             |
| 010     | 0.096             |
| 011     | 0.122             |
| 012     | 0.117             |
| 021     | 0.121             |
| 100     | 0.080             |
| 101     | 0.099             |
| 102     | 0.126             |
| 110     | 0.107             |
| 111     | 0.105             |
| 112     | 0.116             |
| 120     | 0.107             |
| 121     | 0.121             |
| 201     | 0.110             |
| 210     | 0.112             |
| 211     | 0.123             |

**Table S1.** DFT calculated surface energies of the low-index surfaces of Li<sub>9</sub>Al<sub>4</sub> alloy.

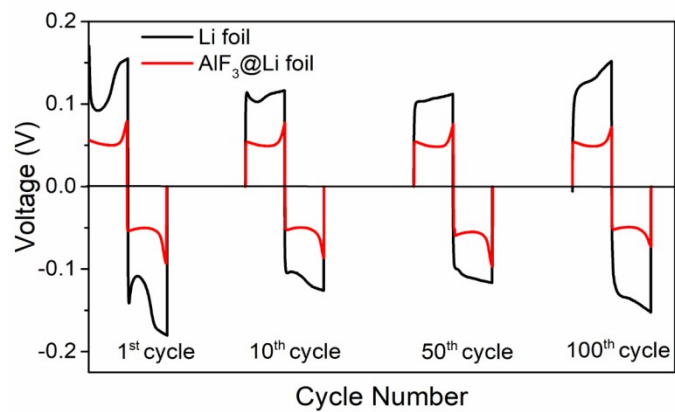

**Figure S4.** Voltage profile of Li foil and AlF<sub>3</sub> protected symmetric cell during the 1st, 10th, 50th and 100th cycle, with a current density of 1 mA cm<sup>-2</sup>.

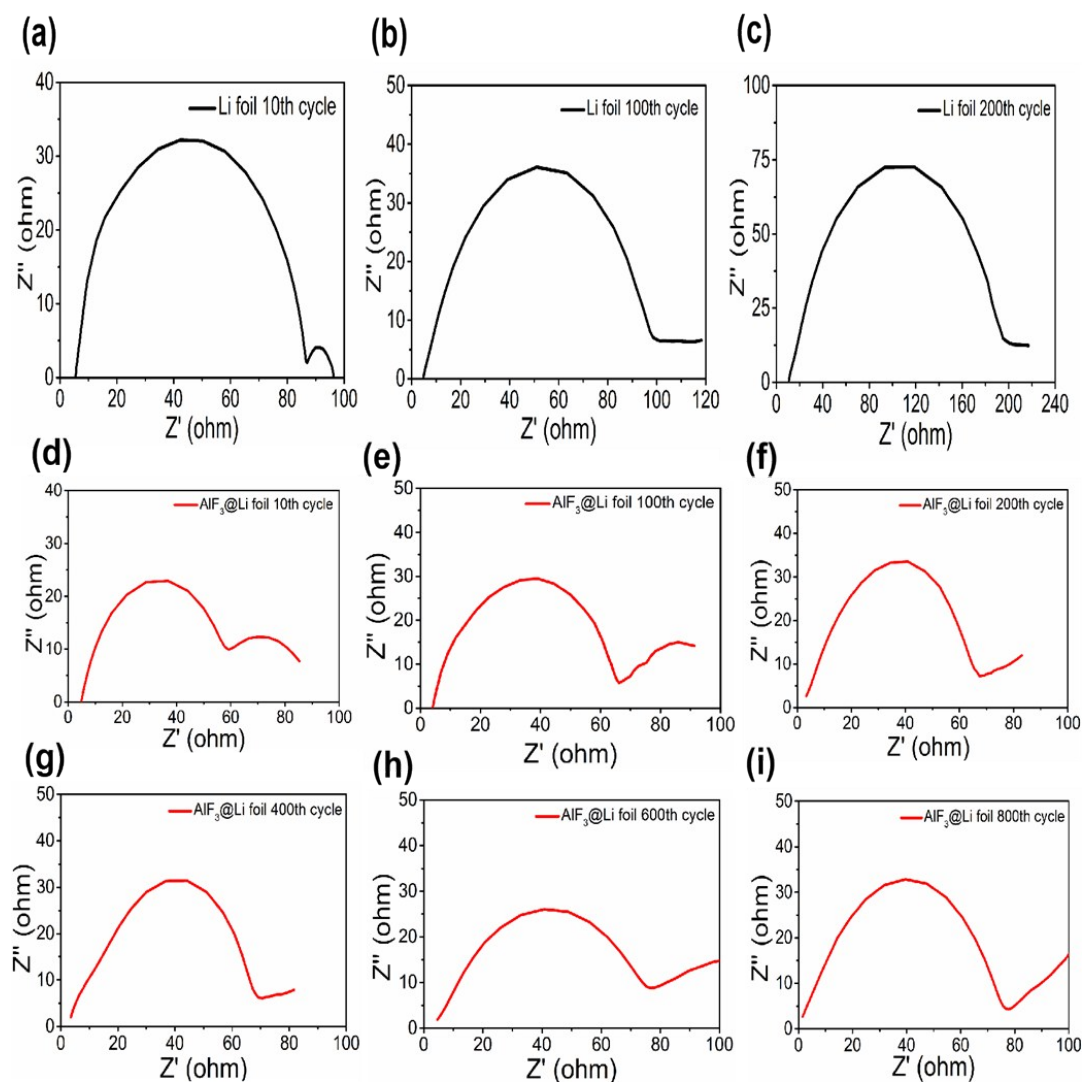

**Figure S5.** Electrochemical impedance spectra (EIS) of the symmetric cells at different cycle for Li foil (black),  $\text{AlF}_3@Li$  foil (red).

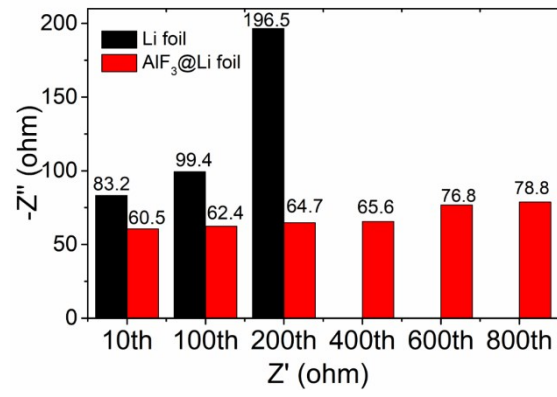

**Figure S6.** EIS comparison of symmetric cells after 10, 100, 200, 400, 600 and 800 cycles.



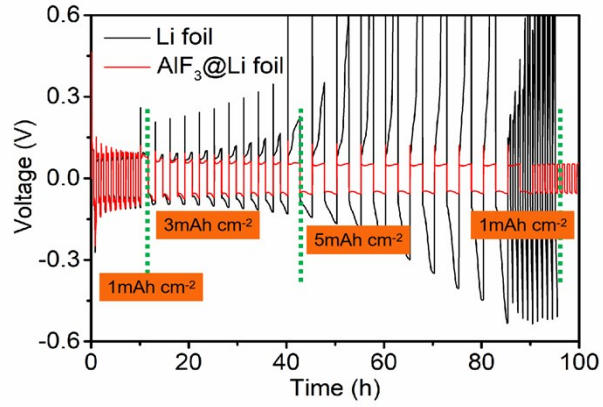

**Figure S7.** Symmetric cell cycling performance comparison between Li foil (black), AlF<sub>3</sub>@Li foil (red) film under different areal capacity from 1 to 5 mAh cm<sup>-2</sup>. Current density was fixed at 1 mA cm<sup>-2</sup>.

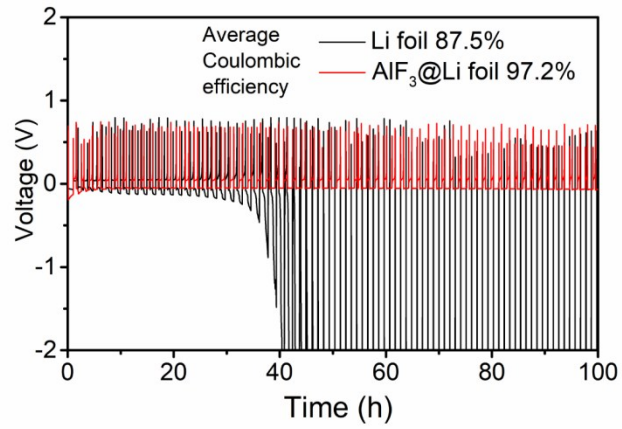

**Figure S8.** Voltage-time curves to calculate the average coulombic efficiency of the pre-plated  $3.0 \text{ mAh cm}^{-2}$  Li for the Li foil and  $\text{AlF}_3@\text{Li}$  foil at a current density of  $1 \text{ mA cm}^{-2}$  ( $1 \text{ mAh cm}^{-2}$  capacity).

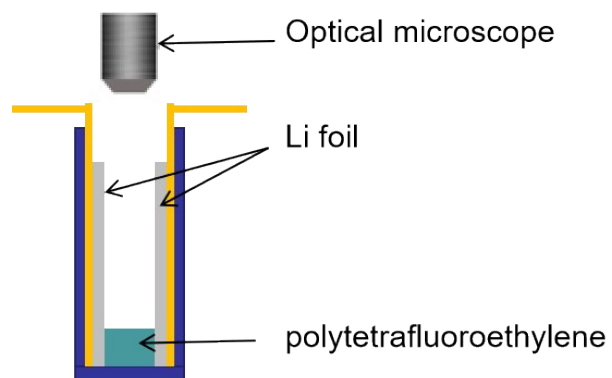

**Figure S9.** Operando optical microscopy adopted to investigate *in-situ* Li plating behavior.

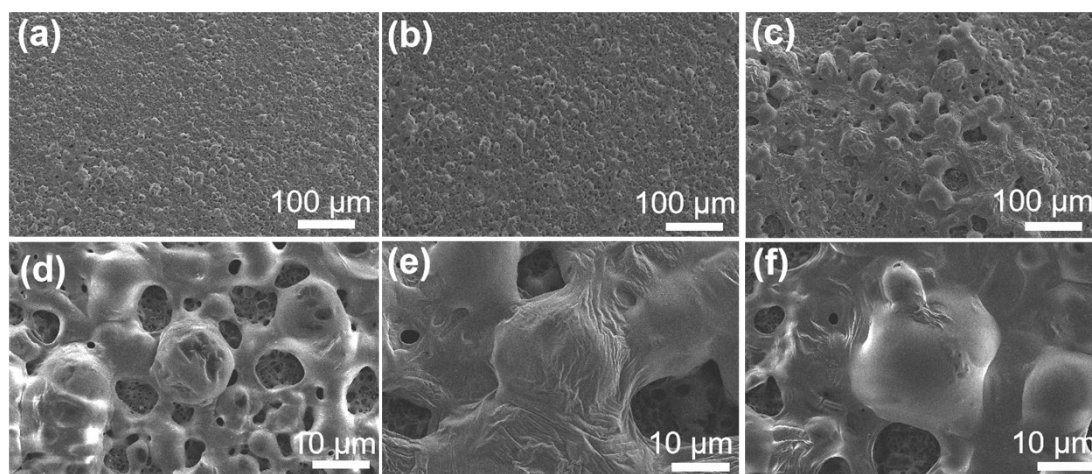

**Figure S10.** SEM of Li deposits on  $\text{AlF}_3$  protected Li foil. (a and d)  $0.1 \text{ mAh cm}^{-2}$ , (b and e)  $0.5 \text{ mAh cm}^{-2}$ , and (c and f)  $1 \text{ mAh cm}^{-2}$ . Current density,  $J = 1 \text{ mAh cm}^{-2}$ .

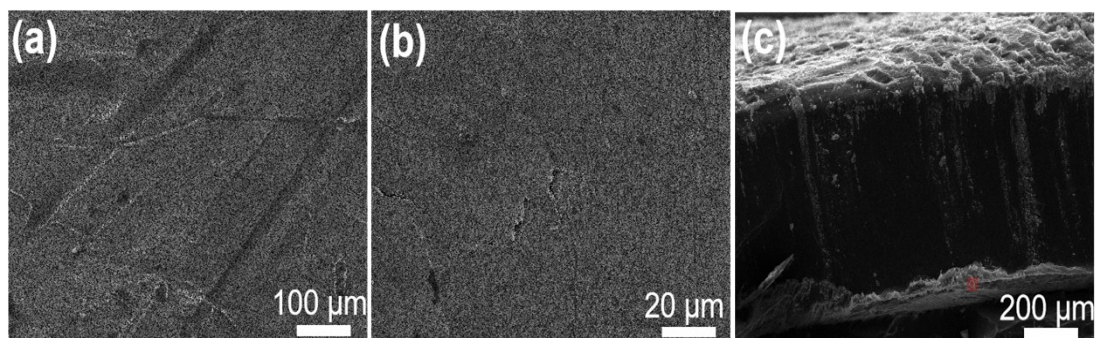

**Figure S11.** Top-view (a, b) and cross-sectional (c) SEM images of Li foil electrode before cycling.

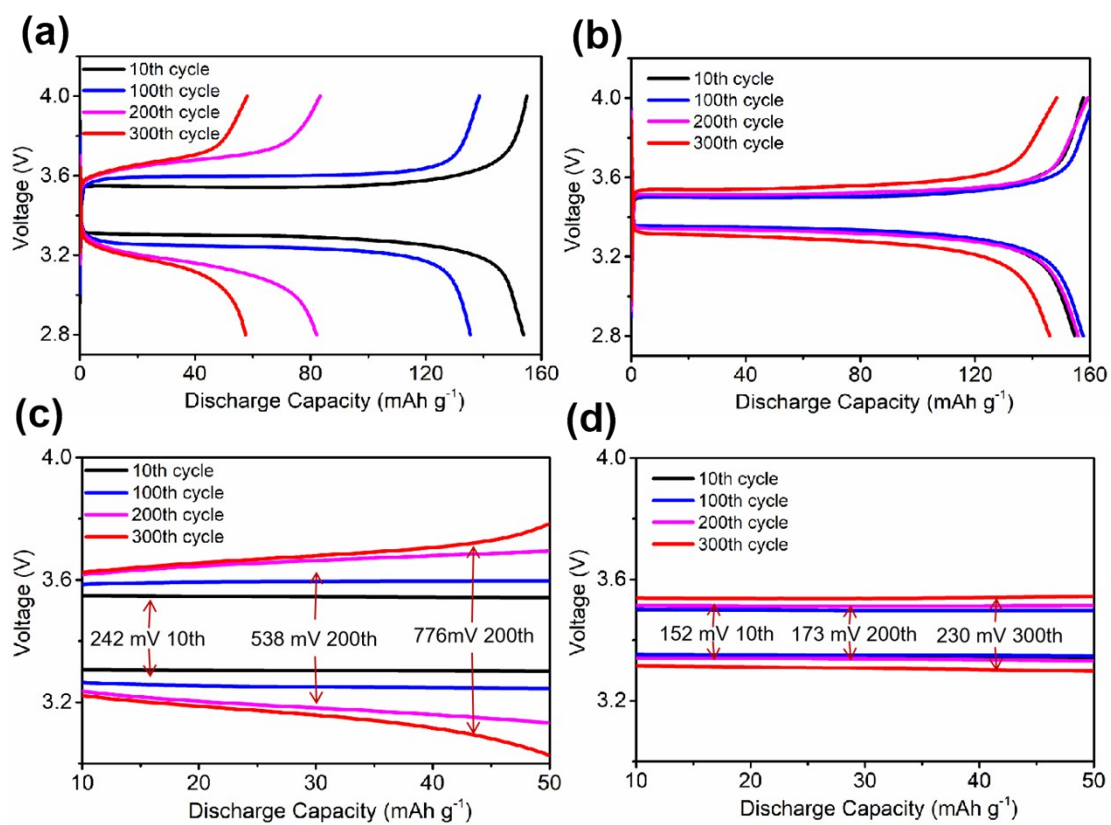

**Figure S12.** The selected (a, b) voltage capacity curves and (c, d) voltage hysteresis of Li foil (a, c) and AlF<sub>3</sub> protected Li foil cells (c, d) in the long term cycles at a rate of 1C (1C=160 mA g<sup>-1</sup>).

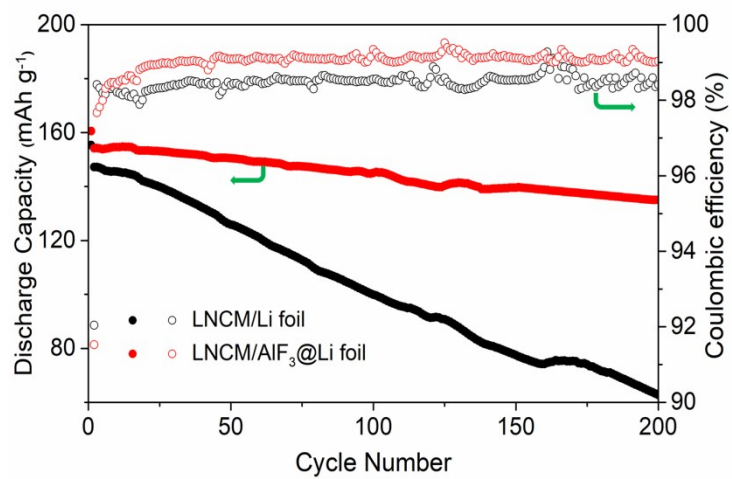

**Figure S13.** Cyclic stability of Li-LNCM battery at 0.5 C rate with high mass loading (6 mg cm<sup>-2</sup>, 1.1 mAh cm<sup>-2</sup>) in the voltage range from 3 to 4.3 V (vs. Li/Li<sup>+</sup>).

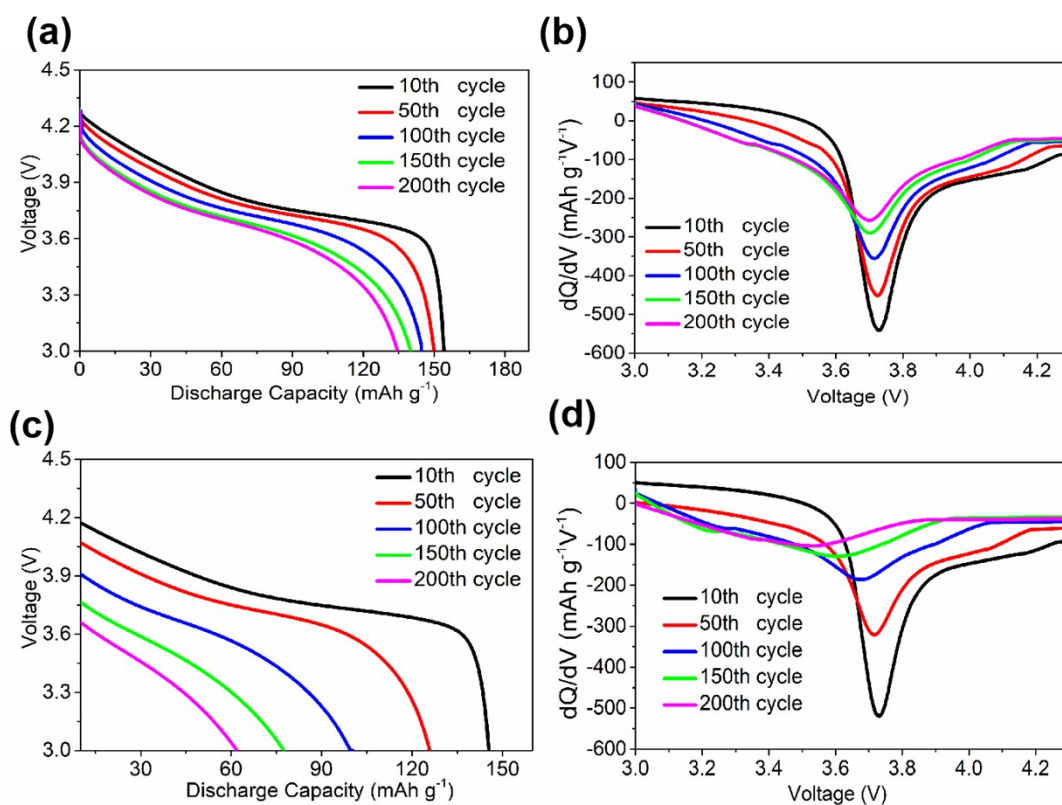

**Figure S14.** Electrochemical performance of rechargeable lithium metal batteries. (a and c ) Discharge capacity curves of the Li foil and AlF<sub>3</sub> protected Li anode of Li-LNCM batteries at 0.5 C rate. (b and d) Differential discharge capacity curves of the Li foil and AlF<sub>3</sub> protected Li anode cell of Li-LNCM batteries at 0.5 C rate. The evolution of peak intensities with the increasing of the cycling times reveals that the protected layer can significantly improve the interface stability between electrolyte and Li foil.



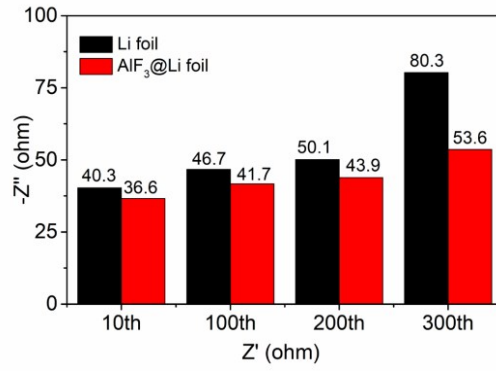

**Figure S15.** EIS comparison of Li-LFP batteries after 10, 100, 200 and 300 at 1 C rate.

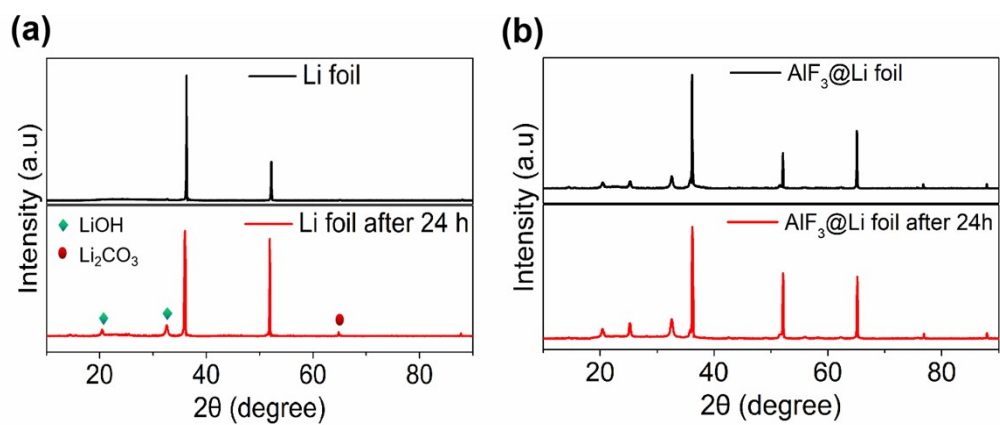

**Figure S16.** XRD characterization of Li foil (a) and AlF<sub>3</sub> protected Li foil (b) before and after 24 h exposed to air at 25°C and 25% humidity.

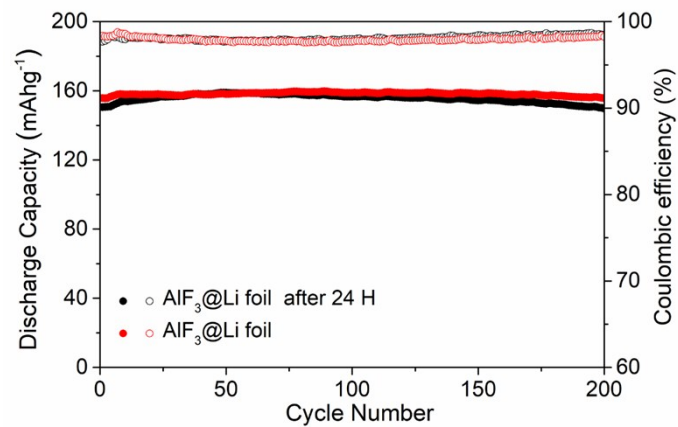

**Figure S17.** Cycling performance of Li-LFP batteries at 1 C rate in voltage range from 2.8 to 4.0 V using  $\text{AlF}_3$  protected Li foil before and after exposure to air at 25°C and 25% relative humidity for 24 h.

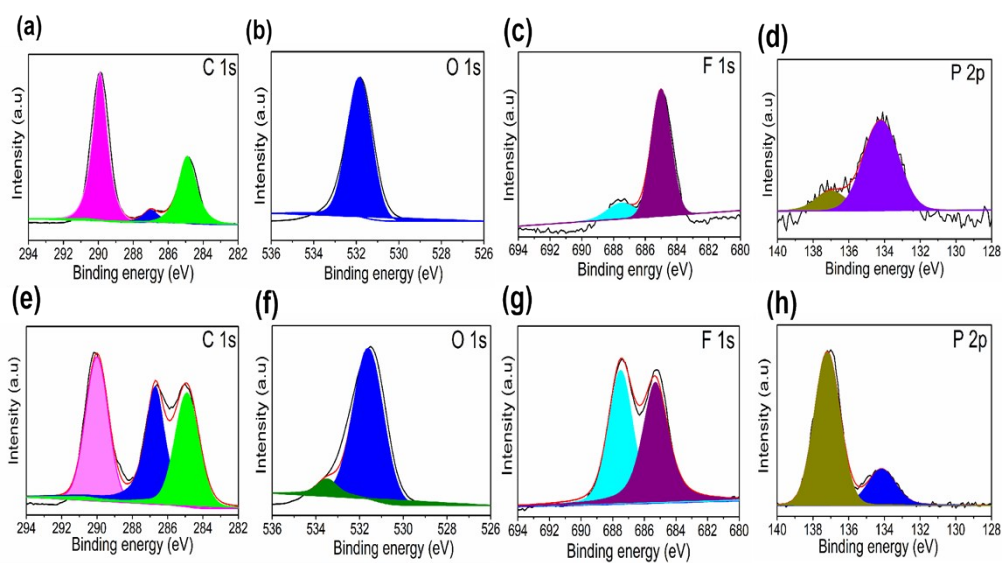

**Figure S18.** Surface chemistry of Li metal anode before (a-d) and after (e-h) 100 cycles. X-ray photoelectron spectroscopy (XPS) of (a. e) C 1s; (b. f) O 1s; (c. g) F 1s; (d. h) P 2p.

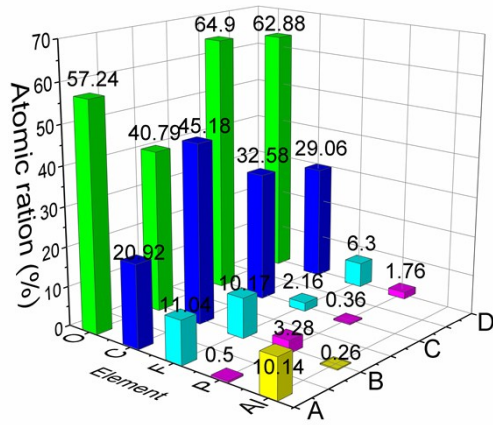

**Figure S19.** Surface chemistry of Li metal anode. The comparison of various element atoms content ratio of the  $\text{AlF}_3$  protected Li (A. B) and Li foil (C. D) before (A. C) and after 100 (B. D) cycles.
